# Supplementary material for: Comprehensive analysis of ALG3 in pan-cancer and validation of ALG3 as an onco-immunological biomarker in breast cancer
Source: publisher site journal article supplement (doi:10.18632/aging.205483), 2024-02-07
Supplement: Supplementary file [file aging-v16i3-205483-supplementary-material-SD2.pdf]

## SUPPLEMENTARY TABLES

Supplementary Table 1. The correlation between ALG3 expression and TMB in pan-cancer.

| Gene1 | cor    | p-value  |
|-------|--------|----------|
| BRCA  | 0.307  | 3.59E-24 |
| LUAD  | 0.305  | 3.18E-12 |
| LGG   | 0.26   | 3.24E-09 |
| PAAD  | 0.445  | 4.72E-09 |
| STAD  | 0.273  | 1.15E-07 |
| HNSC  | 0.208  | 3.76E-06 |
| LIHC  | 0.185  | 0.000987 |
| COAD  | -0.165 | 0.00194  |
| SKCM  | 0.143  | 0.001964 |
| KIRC  | 0.164  | 0.001965 |
| BLCA  | 0.151  | 0.002388 |
| SARC  | 0.179  | 0.006826 |
| PRAD  | 0.1    | 0.028153 |
| ESCA  | -0.16  | 0.048336 |
| THCA  | -0.088 | 0.052552 |
| UVM   | 0.215  | 0.055839 |
| OV    | -0.105 | 0.096102 |
| CHOL  | 0.268  | 0.119015 |
| ACC   | 0.173  | 0.128777 |
| LUSC  | 0.066  | 0.154993 |
| CESC  | -0.113 | 0.17105  |
| GBM   | 0.097  | 0.236941 |
| UCEC  | -0.051 | 0.250991 |
| KIRP  | 0.065  | 0.284375 |
| DLBC  | -0.179 | 0.288619 |
| MESO  | 0.115  | 0.306662 |
| PCPG  | -0.07  | 0.357375 |
| KICH  | 0.087  | 0.4956   |
| THYM  | -0.048 | 0.606539 |
| LAML  | -0.038 | 0.698572 |
| TGCT  | 0.024  | 0.791313 |
| UCS   | 0.034  | 0.80003  |
| READ  | 0.007  | 0.941038 |

**Supplementary Table 2. The correlation between ALG3 expression and MSI in pan-cancer.**

| <b>Gene1</b> | <b>cor</b> | <b>p-value</b> |
|--------------|------------|----------------|
| READ         | -0.42      | 8.16E-08       |
| KIRC         | 0.234      | 1.46E-05       |
| LGG          | -0.155     | 0.000444       |
| LIHC         | 0.158      | 0.00234        |
| STAD         | 0.148      | 0.00406        |
| BLCA         | 0.133      | 0.007216       |
| LUSC         | 0.113      | 0.011966       |
| COAD         | -0.101     | 0.036907       |
| THYM         | -0.125     | 0.173987       |
| LUAD         | 0.058      | 0.186825       |
| ACC          | -0.136     | 0.232332       |
| SKCM         | -0.052     | 0.257731       |
| UVM          | -0.116     | 0.30445        |
| BRCA         | 0.027      | 0.373871       |
| UCEC         | -0.038     | 0.378115       |
| UCS          | -0.115     | 0.394086       |
| THCA         | -0.031     | 0.495778       |
| PCPG         | -0.046     | 0.536034       |
| GBM          | 0.048      | 0.555702       |
| PRAD         | -0.024     | 0.587681       |
| LAML         | -0.042     | 0.658811       |
| ESCA         | -0.03      | 0.706082       |
| CHOL         | -0.06      | 0.732751       |
| KICH         | -0.042     | 0.741147       |
| HNSC         | 0.015      | 0.745897       |
| SARC         | 0.02       | 0.747498       |
| MESO         | 0.026      | 0.813552       |
| DLBC         | -0.022     | 0.880927       |
| PAAD         | -0.01      | 0.891779       |
| KIRP         | 0.006      | 0.914698       |
| OV           | 0.005      | 0.927708       |
| CESC         | -0.001     | 0.991612       |
| TGCT         | 0          | 0.996691       |

**Supplementary Table 3. Association between ALG3 expression level and drug sensitivity.**

| Compound                                       | RNAtype | RNAmolecule | Omics      | Source    | T. stat | T. fdr | Chi. stat | Chi. fdr | Pearson. stat | Pearson. fdr | Spearman. stat | Spearman. fdr |
|------------------------------------------------|---------|-------------|------------|-----------|---------|--------|-----------|----------|---------------|--------------|----------------|---------------|
| PD-0325901                                     | mRNA    | ALG3        | Expression | CCLE      | -       | -      | -         | -        | -             | -            | -0.17213       | 0.035053      |
| 1,6-bis[4-(4-aminophenoxy)phenyl]diamantane    | mRNA    | ALG3        | Expression | CellMiner | -       | -      | -         | -        | 0.46380728    | 0.009709555  | -              | -             |
| antineoplastic-131513                          | mRNA    | ALG3        | Expression | CellMiner | -       | -      | -         | -        | -             | -            | 0.501695       | 0.0174        |
| Benzethonium Chloride                          | mRNA    | ALG3        | Expression | CellMiner | -       | -      | -         | -        | -             | -            | 0.408645       | 0.023312      |
| indole-2,3-dione, 3-[(o-nitrophenyl)hydrazone] | mRNA    | ALG3        | Expression | CellMiner | -       | -      | -         | -        | -             | -            | -0.53322       | 0.002584      |
| sb-590885-aad                                  | mRNA    | ALG3        | Expression | CellMiner | -       | -      | -         | -        | 0.4544494     | 0.007762472  | 0.431296       | 0.042454      |
| sempervirine, nitrate, dihydrate               | mRNA    | ALG3        | Expression | CellMiner | -       | -      | -         | -        | -             | -            | 0.381832       | 0.034496      |
| BX-912                                         | mRNA    | ALG3        | Expression | GDSC      | -       | -      | -         | -        | -             | -            | 0.090154       | 0.010141      |
| BX795                                          | mRNA    | ALG3        | Expression | GDSC      | -       | -      | -         | -        | -             | -            | 0.085795       | 0.028814      |
| CI-1040                                        | mRNA    | ALG3        | Expression | GDSC      | -       | -      | -         | -        | -0.12166483   | 0.001256026  | -0.11084       | 0.003883      |
| FH535                                          | mRNA    | ALG3        | Expression | GDSC      | -       | -      | -         | -        | -             | -            | -0.0935        | 0.03232       |
| Genentech Cpd 10                               | mRNA    | ALG3        | Expression | GDSC      | -       | -      | -         | -        | -             | -            | 0.078334       | 0.029732      |
| GSK429286A                                     | mRNA    | ALG3        | Expression | GDSC      | -       | -      | -         | -        | -             | -            | 0.083435       | 0.017294      |
| GW-2580                                        | mRNA    | ALG3        | Expression | GDSC      | -       | -      | -         | -        | -             | -            | 0.07488        | 0.038217      |
| Olaparib                                       | mRNA    | ALG3        | Expression | GDSC      | -       | -      | -         | -        | -             | -            | 0.081806       | 0.036641      |
| Selumetinib                                    | mRNA    | ALG3        | Expression | GDSC      | -       | -      | -         | -        | -0.1133474    | 0.001614548  | -0.1253        | 0.00041       |
| Tivozanib                                      | mRNA    | ALG3        | Expression | GDSC      | -       | -      | -         | -        | -             | -            | 0.08174        | 0.019842      |
| Trametinib                                     | mRNA    | ALG3        | Expression | GDSC      | -       | -      | -         | -        | -0.1248489    | 0.000340464  | -0.12708       | 0.000241      |
| UNC1215                                        | mRNA    | ALG3        | Expression | GDSC      | -       | -      | -         | -        | -             | -            | 0.07031        | 0.047079      |
| VX-11e                                         | mRNA    | ALG3        | Expression | GDSC      | -       | -      | -         | -        | -0.1036142    | 0.005889225  | -0.10918       | 0.002903      |
